# Supplementary material for: Association between timing and consistency of physical activity and type 2 diabetes: a cohort study on participants of the UK Biobank
Source: PubMed Central journal article supplement (PMC10628002; doi:10.1007/s00125-023-06001-7), 2023-09-20

## Electronic Supplementary Material

Tian et al, Association between Time and Consistency of Physical Activity and Type 2 Diabetes - A Cohort Study on Participants of the UK Biobank

**ESM Table 1.** Comparison between all UK Biobank participants and subsample in our study

|                                          | <b>Overall*</b> | <b>Sample in the study</b> |
|------------------------------------------|-----------------|----------------------------|
| <b>Count</b>                             | 502,409         | 93,095                     |
| <b>Age mean (std)</b>                    | 56.5 (8.1)      | 61.9 (8.1)                 |
| Age <= 65                                | 428,543 (85%)   | 56,535 (61%)               |
| Age > 65                                 | 73,866 (15%)    | 35,560 (39%)               |
| <b>Sex</b>                               |                 |                            |
| Male                                     | 229,085 (46%)   | 40,387 (43%)               |
| Female                                   | 273,324 (54%)   | 52,708 (57%)               |
| <b>BMI mean (std)</b>                    | 27.4 (4.8)      | 26.5 (4.4)                 |
| <b>Baseline HbA1C*</b>                   |                 |                            |
| <b>mean (std)</b>                        | 36.1 (6.8)      | 32.6 (8.9)                 |
| <b>Total household income before tax</b> |                 |                            |
| Less than 18,000                         | 97,180 (20%)    | 11,861 (13%)               |

|                                  |               |              |
|----------------------------------|---------------|--------------|
| 18,000 to 30,999                 | 108,157 (22%) | 19,943 (21%) |
| 31,000 to 51,999                 | 110,751 (22%) | 24,398 (26%) |
| 52,000 to 100,000                | 86,250 (17%)  | 21,753 (23%) |
| Greater than 100,000             | 22,927 (4.6%) | 6,312(6.8%)  |
| Not know                         | 77,144 (15%)  | 8,828 (9.5%) |
| <b>Ethnicity (self-reported)</b> |               |              |
| White                            | 472,609 (95%) | 85,791 (92%) |
| Other                            | 29,800 (5%)   | 7,304 (8%)   |
| <b>Smoking status</b>            |               |              |
| Ever smoked                      | 225,986 (46%) | 55,527 (60%) |
| Never smoked                     | 273,473 (55%) | 37,377 (40%) |
| Not know                         | 2,057 (0.4%)  | 191 (0.2%)   |
| <b>Alcohol intake</b>            |               |              |
| Daily or almost daily            | 101,753 (20%) | 21,444 (23%) |
| Three or four times a week       | 115,422 (23%) | 24,639 (26%) |
| Once or twice a week             | 129,269 (26%) | 23,476 (25%) |
| One to three times a month       | 55,840 (11%)  | 10,079 (11%) |
| Special occasions only           | 57,996 (12%)  | 8,523(9.2%)  |
| Never                            | 40,627 (8.1%) | 4,898 (5.3%) |

|                                              |              |            |
|----------------------------------------------|--------------|------------|
| Not know                                     | 1,502 (0.3%) | 36 (<0.1%) |
| <b>Self-reported nutrition<br/>(serving)</b> |              |            |
| Weekly fish                                  | 2.3 (1.6)    | 2.2 (1.5)  |
| Weekly meat                                  | 3.6 (2.2)    | 3.5 (2.1)  |
| Weekly vegetables                            | 4.9 (3.4)    | 4.8 (3.1)  |
| Weekly fruits                                | 3.1 (2.6)    | 3.1 (2.5)  |

\* The overall population with non-missing genetic and T2D data and available questionnaire responses data

**ESM Table 2.** Hazard Ratio compared to Q1 using quintile-based regression analyses for PA in the morning, afternoon and evening separately with MET hour as the measurement.

|               |    | HR   | 95% CI       | p-value |
|---------------|----|------|--------------|---------|
| Morning MET   | Q2 | 0.76 | [0.66, 0.87] | 0.0001  |
|               | Q3 | 0.66 | [0.56, 0.77] | 1e-7    |
|               | Q4 | 0.67 | [0.56, 0.79] | 1e-6    |
|               | Q5 | 0.62 | [0.51, 0.75] | 4e-7    |
| Afternoon MET | Q2 | 0.97 | [0.85, 1.12] | 0.7052  |
|               | Q3 | 0.84 | [0.72, 0.99] | 0.0338  |
|               | Q4 | 0.79 | [0.66, 0.94] | 0.0077  |
|               | Q5 | 0.73 | [0.60, 0.89] | 0.0020  |
| Evening MET   | Q2 | 0.82 | [0.71, 0.96] | 0.0109  |
|               | Q3 | 0.87 | [0.73, 1.03] | 0.0956  |
|               | Q4 | 0.87 | [0.72, 1.04] | 0.1340  |
|               | Q5 | 0.76 | [0.61, 0.94] | 0.0131  |

**ESM Table 3.** Comparison of Hazard Ratio (HR) for PA in the morning, afternoon, and evening, using different PA metrics. MET and MVPA are measured in hours and VPA is measured in minutes.

|             |            | Morning |              |                 | Afternoon |              |                 | Evening |              |                 |
|-------------|------------|---------|--------------|-----------------|-----------|--------------|-----------------|---------|--------------|-----------------|
| PA Metric   | Model Set* | HR      | 95% CI       | <i>p</i> -value | HR        | 95% CI       | <i>p</i> -value | HR      | 95% CI       | <i>p</i> -value |
| MET (hour)  | Set 1      | 0.95    | [0.91, 0.98] | 0.0011          | 0.91      | [0.87, 0.95] | 2e-5            | 1.01    | [0.97, 1.06] | 0.4799          |
|             | Set 2      | 0.94    | [0.91, 0.98] | 0.0009          | 0.90      | [0.86, 0.94] | 2e-6            | 1.03    | [0.99, 1.08] | 0.0949          |
|             | Set 3      | 0.90    | [0.86, 0.93] | 7e-8            | 0.91      | [0.87, 0.95] | 1e-5            | 0.95    | [0.90, 1.00] | 0.0698          |
| MVPA (hour) | Set 1      | 0.65    | [0.53, 0.81] | 0.0001          | 0.75      | [0.60, 0.94] | 0.0108          | 0.66    | [0.47, 0.93] | 0.0192          |
|             | Set 2      | 0.63    | [0.51, 0.78] | 1e-5            | 0.74      | [0.59, 0.93] | 0.0084          | 0.73    | [0.52, 1.03] | 0.0774          |
|             | Set 3      | 0.60    | [0.48, 0.75] | 7e-6            | 0.78      | [0.63, 0.98] | 0.0315          | 0.68    | [0.48, 0.96] | 0.0290          |

|                     |       |      |                 |        |      |                 |      |      |                 |        |
|---------------------|-------|------|-----------------|--------|------|-----------------|------|------|-----------------|--------|
| VPA<br>(minute<br>) | Set 1 | 0.93 | [0.90,<br>0.96] | 8e-5   | 0.90 | [0.87,<br>0.95] | 1e-5 | 0.91 | [0.86,<br>0.97] | 0.0059 |
|                     | Set 2 | 0.93 | [0.90,<br>0.96] | 9e-5   | 0.90 | [0.86,<br>0.94] | 7e-6 | 0.92 | [0.86,<br>0.98] | 0.0091 |
|                     | Set 3 | 0.93 | [0.90,<br>0.97] | 0.0002 | 0.91 | [0.87,<br>0.95] | 1e-5 | 0.92 | [0.86,<br>0.98] | 0.0085 |

\* The first set was adjusted for basic information: sex, age, ethnicity and BMI. The second set was added adjustment for socioeconomic factors: education and household income. The third set was further adjusted for lifestyle factors: smoke status, alcohol intake, sleep duration, and dietary information.

**ESM Table 4.** Effect of substituting PA at different times. MET and MVPA are measured in hours while VPA is measured in minutes.

|              |                        | SAM <sup>1</sup> |              |                 | SAE  |              |                 | SME  |              |                 |
|--------------|------------------------|------------------|--------------|-----------------|------|--------------|-----------------|------|--------------|-----------------|
| PA Measure   | Model Set <sup>2</sup> | HR               | 95% CI       | <i>p</i> -value | HR   | 95% CI       | <i>p</i> -value | HR   | 95% CI       | <i>p</i> -value |
| MET (hour)   | Set 1                  | 0.96             | [0.90, 1.03] | 0.2829          | 0.90 | [0.84, 0.97] | 0.0036          | 0.93 | [0.89, 0.98] | 0.0041          |
|              | Set 2                  | 0.96             | [0.90, 1.02] | 0.1689          | 0.87 | [0.81, 0.94] | 0.0002          | 0.91 | [0.87, 0.96] | 0.0002          |
|              | Set 3                  | 1.01             | [0.94, 1.08] | 0.7643          | 0.95 | [0.88, 1.03] | 0.2318          | 0.94 | [0.89, 1.00] | 0.0345          |
| MVPA (hour)  | Set 1                  | 1.15             | [0.78, 1.67] | 0.4823          | 1.13 | [0.70, 1.83] | 0.6065          | 0.96 | [0.65, 1.51] | 0.9636          |
|              | Set 2                  | 1.18             | [0.81, 1.73] | 0.3811          | 1.01 | [0.63, 1.63] | 0.9626          | 0.85 | [0.56, 1.30] | 0.4584          |
|              | Set 3                  | 1.30             | [0.88, 1.90] | 0.1853          | 1.16 | [0.72, 1.88] | 0.5461          | 0.89 | [0.58, 1.37] | 0.6104          |
| VPA (minute) | Set 1                  | 0.97             | [0.91, 1.04] | 0.4082          | 0.99 | [0.91, 1.08] | 0.8102          | 1.02 | [0.94, 1.10] | 0.6610          |

|  |       |      |                 |        |      |                 |        |      |                 |        |
|--|-------|------|-----------------|--------|------|-----------------|--------|------|-----------------|--------|
|  | Set 2 | 0.97 | [0.91,<br>1.04] | 0.3768 | 0.98 | [0.90,<br>1.07] | 0.6812 | 1.01 | [0.94,<br>1.10] | 0.7587 |
|  | Set 3 | 0.97 | [0.91,<br>1.04] | 0.4210 | 0.99 | [0.91,<br>1.08] | 0.7906 | 1.02 | [0.94,<br>1.10] | 0.6926 |

SAM: Substitute Afternoon for Morning

SAE: Substitute Afternoon for Evening

SME: Substitute Morning for Evening

<sup>1</sup> This means increasing PA in the afternoon by one unit while decreasing PA in the morning by one unit.

<sup>2</sup> The first set was adjusted for basic information: sex, age, ethnicity and BMI. The second set was added adjustment for socioeconomic factors: education and household income. The third set was further adjusted for lifestyle factors: smoke status, alcohol intake, sleep duration, and dietary information.

**ESM Figure 1.** Box plot of MVPA (measured in hours per day) stratified by timing and T2D

outcome.

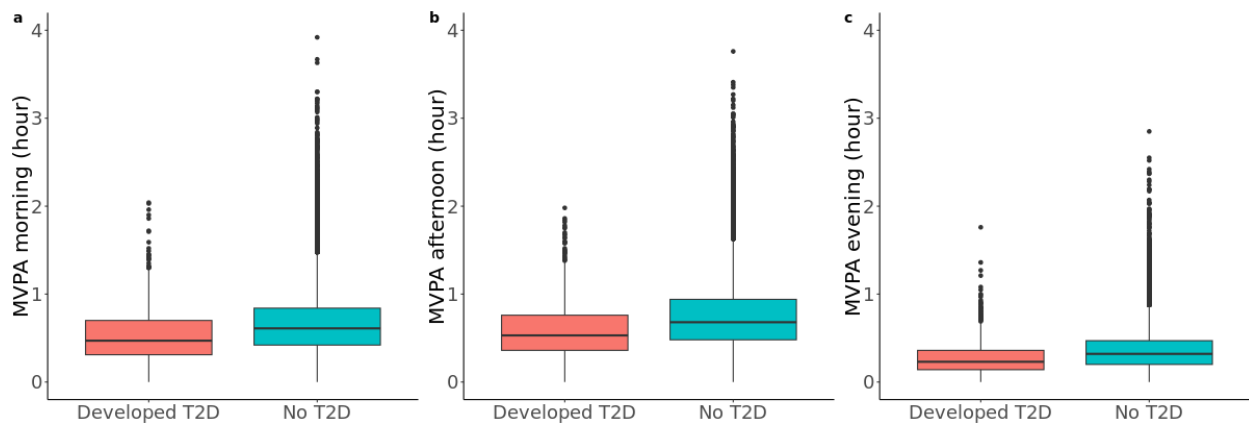



**ESM Figure 2.** Box plot of VPA (measured in minutes per day) stratified by timing and T2D

outcome.

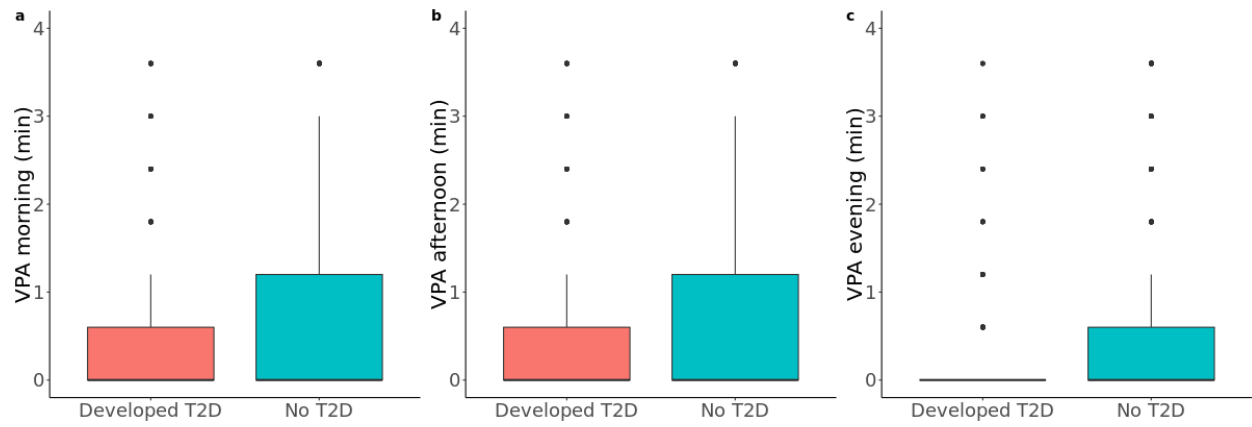

Supplement: 125_2023_6001_MOESM1_ESM.pdf [file 125_2023_6001_MOESM1_ESM.pdf]
